# Supplementary material for: Indolizine quaternary ammonium salt inhibitors part II: a reinvestigation of an old-fashioned strong acid corrosion inhibitor phenacyl quinolinium bromide and its indolizine derivative
Source: Royal Society of Chemistry journal article supplement (doi:10.1039/c8nj02505c), 2018-01-01
Supplement: c8nj02505c1.pdf [file c8nj02505c1.pdf]

# Indolizine quaternary ammonium salt inhibitors part II :a reinvestigation of an old fashioned strong acid corrosion inhibitor phenacyl quinolinium bromide and its indolizine derivative

*Yefei Wang<sup>\*1</sup>, Zhen Yang<sup>1</sup>, Fengtao Zhan<sup>2</sup>, Zhifeng LYu<sup>2</sup>, Chengyou Han<sup>2</sup>, Xiaonuo Wang<sup>2</sup>, Wuhua Chen<sup>1</sup>, Mingchen Ding<sup>1</sup>, Renzhuo Wang<sup>1</sup>, Yingnan Jiang<sup>3</sup>*

<sup>1</sup>College of Petroleum Engineering, China University of Petroleum (East China), 66 West Changjiang Rd, Qingdao, Shandong Province, 266580, P. R. China

<sup>2</sup>College of Science, China University of Petroleum (East China), 66 West Changjiang Rd, Qingdao, Shandong Province, 266580, P. R. China

<sup>3</sup>College of Computer Engineering, Cinema and Mechatronics, Politecnico di Torino, 24 Corso duca degli abruzzi, Torino, 10129, Italy

## Electronic Supplementary Information:

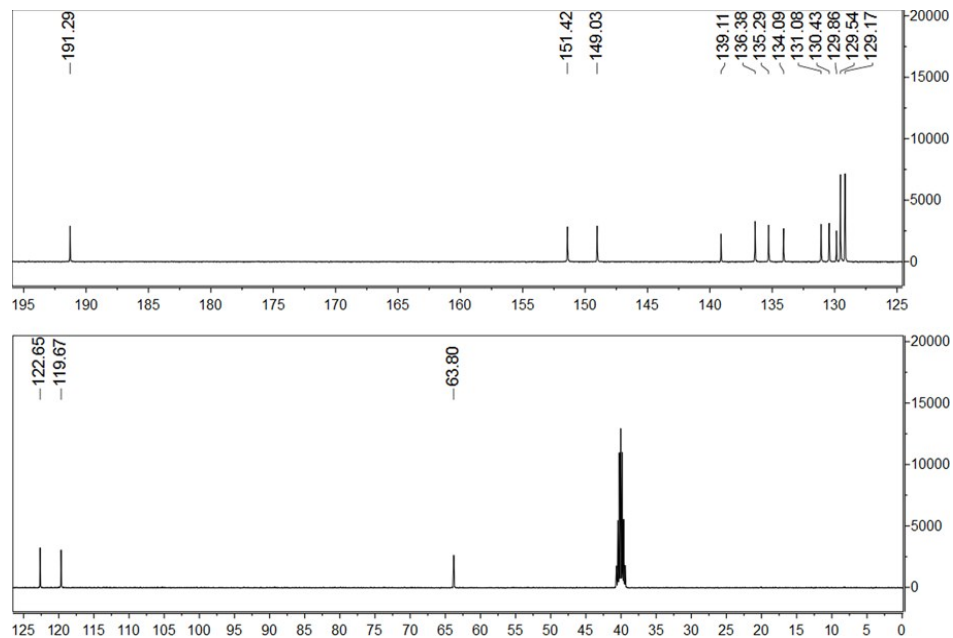

**Fig. S1**  $^{13}\text{C}$ -NMR spectrum of PaQBr.

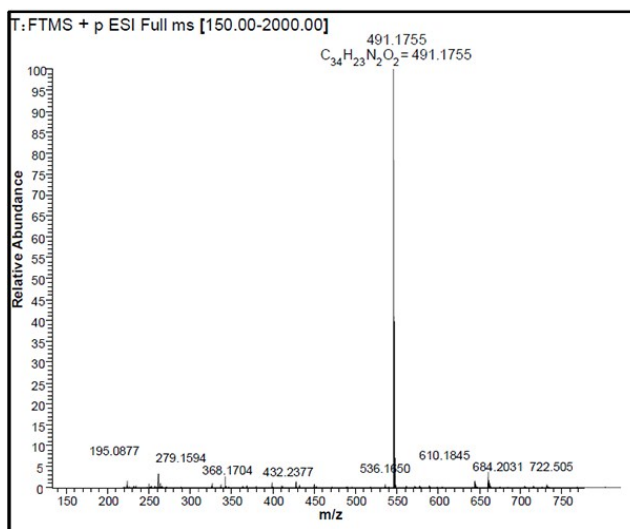

**Fig. S2** HRMS spectrum of DiPaQBr.

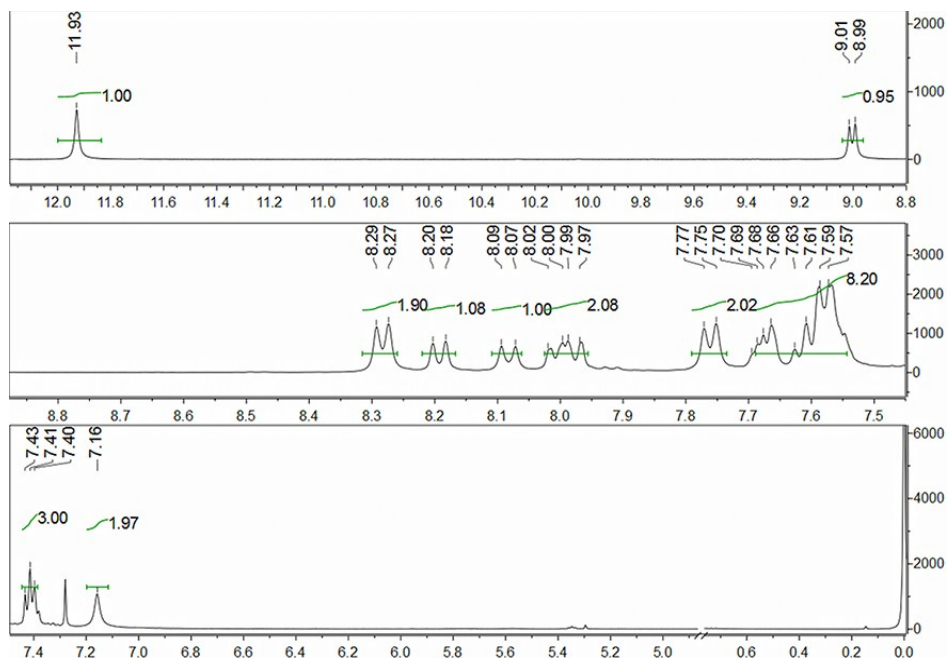

**Fig. S3**  $^1\text{H-NMR}$  spectrum of DiPaQBr.

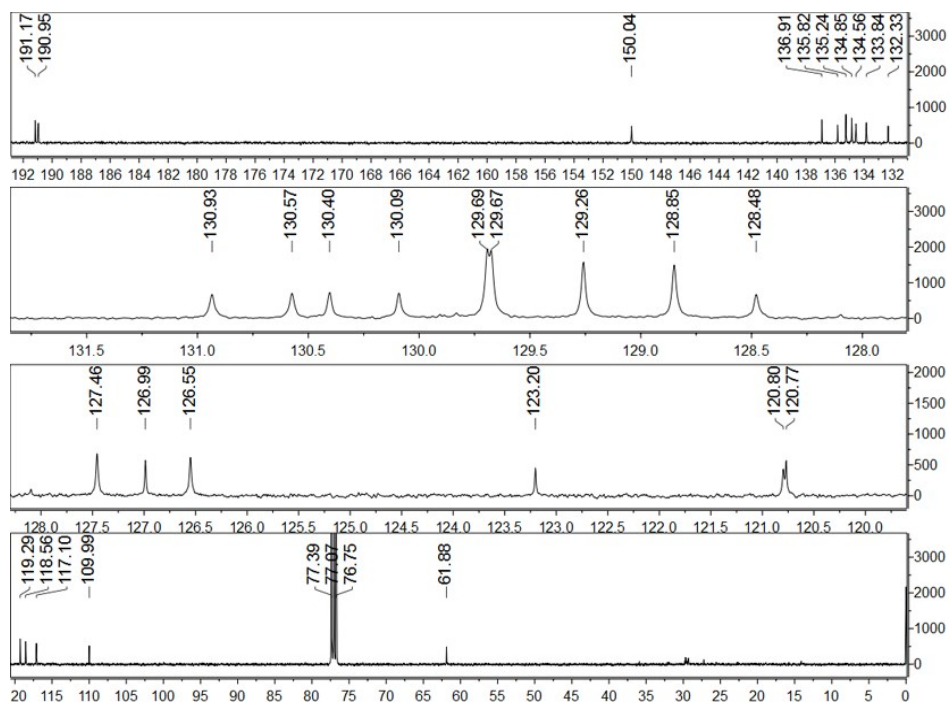

**Fig. S4**  $^{13}\text{C-NMR}$  spectrum of DiPaQBr (solvent peaks were  $\delta=76.75, 77.07, 77.39$ ).

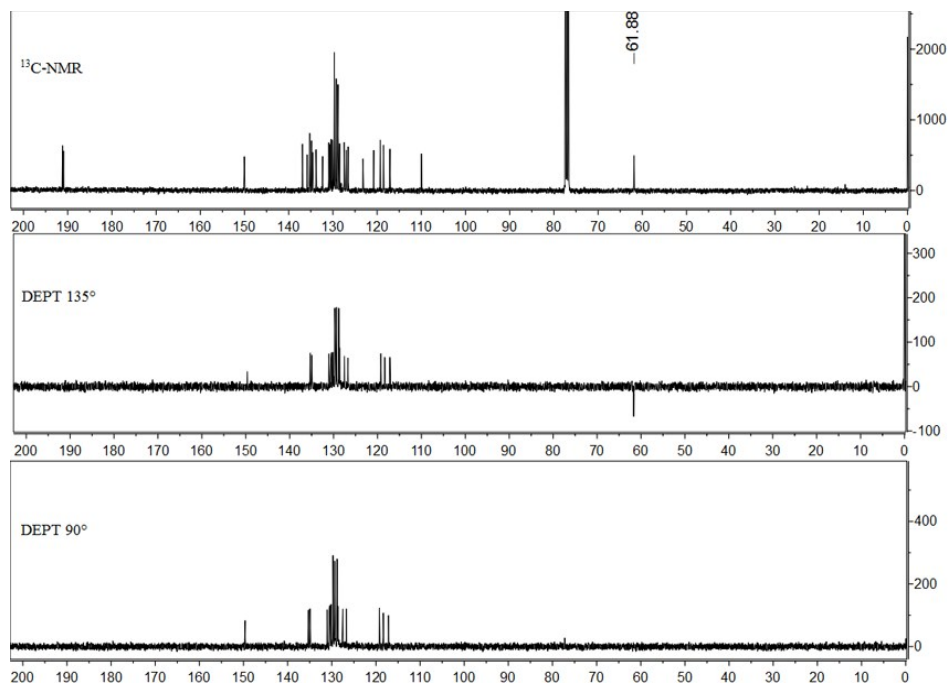

Fig. S5 (a)  $^{13}\text{C}$ -DEPT spectrum of DiPaQBr (solvent peaks were  $\delta = 76.75, 77.07, 77.39$ ).

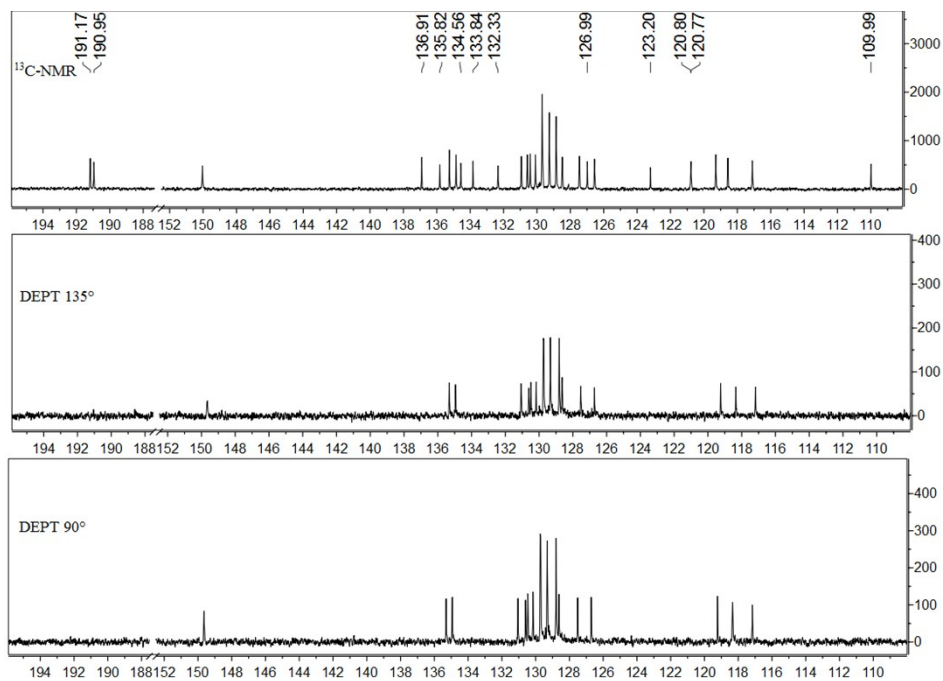

Fig. S5 (b)  $^{13}\text{C}$ -DEPT spectrum of DiPaQBr (details of  $\delta = 109$  to  $194$ ).
